# Supplementary material
Source: ML conference proceedings conference paper supplement (https://openreview.net/forum?id=32JgYdTfT9)
Supplement: supplementary_material [file supp_of_DAWP.pdf › supplementary/supp_of_DAWP.pdf]

---

# DAWP: A framework for global observation forecasting via Data Assimilation and Weather Prediction in satellite observation space

---

Anonymous Author(s)

Affiliation

Address

email

## 1 More experiment results

Table 1: More results on spatiotemporal methods. MAE error of forecasting during 3 lead time periods (0-12h, 12-24h, and 24-36h) for different channels of the satellite data. We use the unit of  $1e-5$  for AMSU-A,  $1e-4$  for MHS, and  $1e-0$  for both ATMS and HIRS.

| Methods             | Lead time | AMSU-A |        | ATMS  |       | HIRS  |       | MHS   |        |
|---------------------|-----------|--------|--------|-------|-------|-------|-------|-------|--------|
|                     |           | ch0    | ch1    | ch0   | ch1   | ch9   | ch10  | ch0   | ch1    |
| Persistence [1]     | 0-12h     | 5.86   | 9.15   | 14.37 | 11.69 | 12.43 | 2.21  | 7.01  | 14.74  |
| ConvLSTM [2]        |           | 127.82 | 208.90 | 73.21 | 78.44 | 77.40 | 11.05 | 62.27 | 158.57 |
| PredRNN [3]         |           | 2.95   | 4.96   | 6.99  | 6.21  | 9.26  | 1.42  | 4.11  | 10.20  |
| RainFormer [4]      |           | 3.95   | 6.52   | 9.08  | 8.05  | 10.41 | 1.63  | 4.98  | 11.69  |
| EarthFormer [1]     |           | 18.97  | 33.94  | 37.33 | 38.75 | 22.49 | 3.62  | 18.00 | 55.04  |
| SimVP [5]           |           | 3.61   | 6.02   | 7.29  | 6.61  | 9.84  | 1.53  | 4.68  | 11.35  |
| TAU [6]             |           | 3.84   | 6.31   | 7.70  | 6.86  | 9.94  | 1.58  | 4.87  | 11.42  |
| EarthNet [7]        |           | 2.93   | 4.89   | 6.96  | 6.14  | 9.15  | 1.39  | 3.96  | 9.65   |
| Transformer-DOP [8] |           | 2.67   | 4.48   | 6.40  | 5.61  | 9.22  | 1.42  | 3.91  | 9.48   |
| Ours                |           | 1.92   | 3.39   | 3.36  | 3.27  | 7.70  | 1.12  | 3.07  | 7.91   |
| Persistence [1]     | 12-24h    | 4.35   | 6.94   | 10.40 | 8.86  | 13.58 | 2.30  | 6.07  | 15.09  |
| ConvLSTM [2]        |           | 128.13 | 211.14 | 81.22 | 82.60 | 71.64 | 9.98  | 59.26 | 145.44 |
| PredRNN [3]         |           | 3.85   | 6.26   | 11.14 | 8.82  | 10.92 | 1.84  | 5.48  | 13.16  |
| RainFormer [4]      |           | 11.46  | 15.72  | 19.43 | 17.76 | 18.75 | 3.28  | 11.74 | 32.10  |
| EarthFormer [1]     |           | 18.98  | 33.96  | 37.33 | 38.76 | 22.50 | 3.62  | 18.01 | 55.03  |
| SimVP [5]           |           | 4.83   | 7.74   | 11.48 | 9.10  | 11.49 | 2.02  | 6.43  | 14.20  |
| TAU [6]             |           | 4.46   | 7.21   | 11.46 | 9.06  | 11.65 | 2.04  | 6.24  | 13.94  |
| EarthNet [7]        |           | 4.12   | 6.65   | 11.25 | 9.00  | 11.14 | 1.98  | 5.46  | 13.11  |
| Transformer-DOP [8] |           | 3.84   | 6.14   | 10.04 | 8.04  | 11.08 | 1.95  | 5.19  | 12.65  |
| Ours [1]            |           | 3.11   | 5.12   | 7.35  | 6.35  | 9.57  | 1.54  | 4.51  | 10.54  |
| Persistence [1]     | 24-36h    | 6.39   | 9.84   | 15.37 | 12.52 | 14.61 | 2.61  | 8.00  | 17.86  |
| ConvLSTM [2]        |           | 128.42 | 211.83 | 82.03 | 85.17 | 72.62 | 10.15 | 60.44 | 148.62 |
| PredRNN [3]         |           | 4.58   | 7.23   | 12.18 | 9.69  | 12.03 | 2.08  | 6.24  | 15.04  |
| RainFormer [4]      |           | 24.89  | 32.34  | 35.49 | 36.54 | 30.78 | 4.92  | 21.51 | 69.68  |
| EarthFormer [1]     |           | 18.98  | 33.96  | 37.34 | 38.77 | 22.51 | 3.63  | 18.02 | 55.04  |
| SimVP [5]           |           | 5.72   | 8.91   | 12.93 | 10.33 | 12.71 | 2.32  | 73.95 | 15.99  |
| TAU [6]             |           | 5.61   | 8.76   | 13.23 | 10.53 | 12.98 | 2.34  | 7.15  | 15.85  |
| EarthNet [7]        |           | 5.17   | 8.14   | 12.52 | 10.08 | 12.37 | 2.36  | 6.41  | 15.08  |
| Transformer-DOP [8] |           | 4.91   | 7.54   | 11.35 | 9.07  | 12.39 | 2.27  | 6.22  | 14.70  |
| Ours                |           | 3.66   | 5.80   | 7.84  | 6.81  | 10.71 | 1.79  | 5.15  | 12.22  |

As shown in Table 1, we compare DAWP with more spatiotemporal methods including RNN-based ( [2], [3]), CNN-based ( [5], [6]), and transformer-based ( [4], [1]). Our DAWP maintains a

4 significant advantage over these methods, demonstrating the effectiveness of our AIDA module in  
5 improving the roll-out and efficiency of AIWP.

## 6 **2 Detailed dynamic visualization**

7 We provide videos of the predictions in the form of .gif. These results exhibit that our DAWP  
8 successfully simulates the long-term trend of observations, while other methods fail to capture the  
9 long-term trend.

10 Lastly, it is worth noting that the ground-truth magnitudes appear slightly weaker than the predictions.  
11 This discrepancy arises because the ground-truth data are sparse, and `ax.imshow()` fills in the gaps by  
12 interpolating using the background value.

## References

- [1] Zhihan Gao, Xingjian Shi, Hao Wang, Yi Zhu, Yuyang Bernie Wang, Mu Li, and Dit-Yan Yeung. Earthformer: Exploring space-time transformers for earth system forecasting. *Advances in Neural Information Processing Systems*, 35:25390–25403, 2022.
- [2] Xingjian Shi, Zhourong Chen, Hao Wang, Dit-Yan Yeung, Wai-Kin Wong, and Wang-chun Woo. Convolutional lstm network: A machine learning approach for precipitation nowcasting. *Advances in neural information processing systems*, 28, 2015.
- [3] Yunbo Wang, Haixu Wu, Jianjin Zhang, Zhifeng Gao, Jianmin Wang, Philip S Yu, and Mingsheng Long. Predrnn: A recurrent neural network for spatiotemporal predictive learning. *IEEE Transactions on Pattern Analysis and Machine Intelligence*, 45(2):2208–2225, 2022.
- [4] Cong Bai, Feng Sun, Jinglin Zhang, Yi Song, and Shengyong Chen. Rainformer: Features extraction balanced network for radar-based precipitation nowcasting. *IEEE Geoscience and Remote Sensing Letters*, 19:1–5, 2022.
- [5] Zhangyang Gao, Cheng Tan, Lirong Wu, and Stan Z Li. Simvp: Simpler yet better video prediction. In *Proceedings of the IEEE/CVF conference on computer vision and pattern recognition*, pages 3170–3180, 2022.
- [6] Cheng Tan, Zhangyang Gao, Lirong Wu, Yongjie Xu, Jun Xia, Siyuan Li, and Stan Z Li. Temporal attention unit: Towards efficient spatiotemporal predictive learning. In *Proceedings of the IEEE/CVF Conference on Computer Vision and Pattern Recognition*, pages 18770–18782, 2023.
- [7] Thomas J Vandal, Kate Duffy, Daniel McDuff, Yoni Nachmany, and Chris Hartshorn. Global atmospheric data assimilation with multi-modal masked autoencoders. *arXiv preprint arXiv:2407.11696*, 2024.
- [8] Anthony McNally, Christian Lessig, Peter Lean, Eulalie Boucher, Mihai Alexe, Ewan Pinnington, Matthew Chantry, Simon Lang, Chris Burrows, Marcin Chrust, et al. Data driven weather forecasts trained and initialised directly from observations. *arXiv preprint arXiv:2407.15586*, 2024.
